# Supplementary material for: Cardiac Cine MRI Radiomics: Analysis of Feature Reproducibility and Evaluation of Variations in the Context of Heart Failure
Source: Research Square preprint supplement (doi:10.21203/rs.3.rs-6912341/v1), 2025-07-02
Supplement: Supplementary file 2 [file e976db77fdbc91cfa877a52d.docx]

# Supplementary Material

## **ICC Values for Reproducibility Analysis**

Calculated ICC Values of interobserver und intraobserver reproducibility for Radiomics Features of LVBP LVM and RVBP are shown in respectively Tables S1. and S2.

## **Calculation of Special Radiomics Features**

### Strain Calculation

We calculate myocardial strain from dense image-derived 2D+t deformation fields for every slice, using the phase-based Morphon method (Tobon-Gomez 2013) for field calculation. We transform the fields to reflect the deformation in each frame with respect to the first reference frame. The Green-Lagrange strain tensor E is calculated from the gradient of the deformation field:

We transform this Cartesian strain tensor to principal strains. The local coordinate system for each position is calculated from the radial components , pointing towards the center of the segmentation, and the circumferential component , rotated by 90 degrees:

### Fractal Dimensions

Fractal dimensions are a statistical tool to assess how the length or complexity of a contour increases while increasing the scale or detail at which it is measured. More specifically, we analyze the Minkowski–Bouligand dimension, also known as box-counting dimension, is an explicit implementation of fractal dimensions. The original algorithm places an evenly spaced grid onto an object of interest and counts how many boxes of size are needed to cover all foreground pixels of the whole structure. This procedure is repeated at decreasing . The box-counting dimension relates to via

,

so that is given by

.

We apply an Otsu threshold to the masked LV bloodpool to remove the papillary muscles.

## **Influence of Spatial vs. Temporal Resolution**


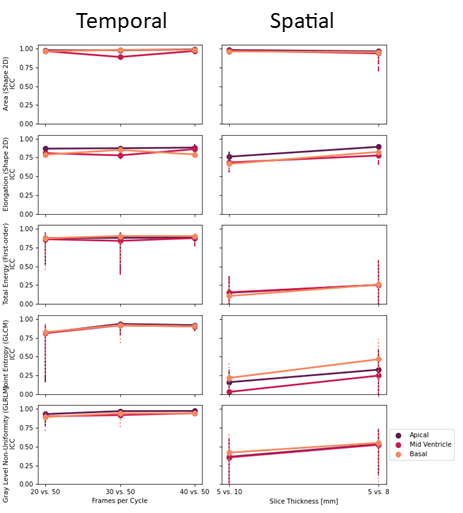


*Figure S1: Intraobserver reproducibility for LVBP average ICCs and confidence intervals.*

*A: maximal spatial resolution fixed, ICC values for assessment of feature reproducibility on different temporal resolutions.*

*B: maximal temporal resolution fixed, ICC values for assessment of feature reproducibility on different spatial resolutions (slice thickness)*


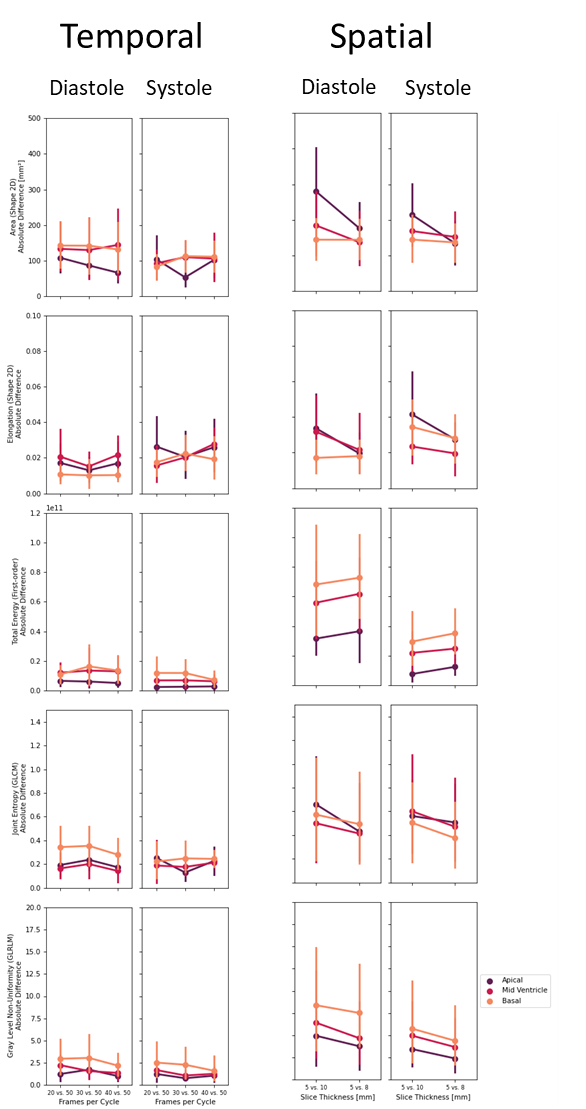


*Figure S2: Absolute difference values between selected LVBP feature values at diastole and systole.*

*A: maximal spatial resolution fixed, different temporal resolutions. B: maximal temporal resolution fixed, different spatial resolutions (slice thickness).*

SUPPLEMENTARY TABS

## Table S1. Inter-observer ICC Scores of Radiomic features

ICC values for interobserver reproducibility of listed radiomic features on high and low-resolution images.

| Feature | ICC | Acquisition |
| --- | --- | --- |
| Left Myocardium Joint Energy (GLCM) | 0,948 | High resolution |
| Left Myocardium Joint Energy (GLCM) | 0,888 | Low resolution |
| Left Myocardium Sum Entropy (GLCM) | 0,962 | High resolution |
| Left Myocardium Sum Entropy (GLCM) | 0,816 | Low resolution |
| Left Bloodpool Gray Level Non-Uniformity (GLDM) | 0,991 | High resolution |
| Left Bloodpool Gray Level Non-Uniformity (GLDM) | 0,973 | Low resolution |
| Right Bloodpool Gray Level Non-Uniformity (GLSZM) | 0,998 | High resolution |
| Right Bloodpool Gray Level Non-Uniformity (GLSZM) | 0,974 | Low resolution |
| Left Bloodpool Sum Entropy (GLCM) | 0,978 | High resolution |
| Left Bloodpool Sum Entropy (GLCM) | 0,893 | Low resolution |
| Left Bloodpool Sphericity (Shape 2D) | 0,361 | High resolution |
| Left Bloodpool Sphericity (Shape 2D) | 0,490 | Low resolution |
| Circumferential Strain (min) | 0,930 | High resolution |
| Circumferential Strain (min) | 0,977 | Low resolution |
| Left Myocardium Dependence Entropy (GLDM) | 0,913 | High resolution |
| Left Myocardium Dependence Entropy (GLDM) | 0,650 | Low resolution |
| Left Bloodpool Zone Entropy (GLSZM) | 0,978 | High resolution |
| Left Bloodpool Zone Entropy (GLSZM) | 0,950 | Low resolution |
| Left Myocardium Short Run Emphasis (GLRLM) | 0,986 | High resolution |
| Left Myocardium Short Run Emphasis (GLRLM) | 0,979 | Low resolution |
| Right Bloodpool Gray Level Non-Uniformity (GLRLM) | 0,998 | High resolution |
| Right Bloodpool Gray Level Non-Uniformity (GLRLM) | 0,987 | Low resolution |
| Left Myocardium Joint Entropy (GLCM) | 0,968 | High resolution |
| Left Myocardium Joint Entropy (GLCM) | 0,788 | Low resolution |
| Left Bloodpool Gray Level Non-Uniformity (GLSZM) | 0,984 | High resolution |
| Left Bloodpool Gray Level Non-Uniformity (GLSZM) | 0,973 | Low resolution |
| Relative RV Diameter | 0,979 | High resolution |
| Relative RV Diameter | 0,815 | Low resolution |
| Right Bloodpool Gray Level Non-Uniformity (GLDM) | 0,998 | High resolution |
| Right Bloodpool Gray Level Non-Uniformity (GLDM) | 0,989 | Low resolution |
| Left Bloodpool Dependence Entropy (GLDM) | 0,968 | High resolution |
| Left Bloodpool Dependence Entropy (GLDM) | 0,951 | Low resolution |
| Left Bloodpool Short Run Emphasis (GLRLM) | 0,987 | High resolution |
| Left Bloodpool Short Run Emphasis (GLRLM) | 0,931 | Low resolution |
| Right Bloodpool Sphericity (Shape 2D) | 0,865 | High resolution |
| Right Bloodpool Sphericity (Shape 2D) | 0,776 | Low resolution |
| Left Myocardium Dependence Non-Uniformity (GLDM) | 0,916 | High resolution |
| Left Myocardium Dependence Non-Uniformity (GLDM) | 0,730 | Low resolution |
| Left Bloodpool Dependence Non-Uniformity (GLDM) | 0,981 | High resolution |
| Left Bloodpool Dependence Non-Uniformity (GLDM) | 0,957 | Low resolution |
| Radial Strain (mean) | 0,950 | High resolution |
| Radial Strain (mean) | 0,965 | Low resolution |
| Radial Strain (max) | 0,930 | High resolution |
| Radial Strain (max) | 0,983 | Low resolution |
| Left Bloodpool Mean (First-order) | 0,993 | High resolution |
| Left Bloodpool Mean (First-order) | 0,937 | Low resolution |
| Left Myocardium Energy (First-order) | 0,984 | High resolution |
| Left Myocardium Energy (First-order) | 0,794 | Low resolution |
| Area Ratio LV/RV | 0,891 | High resolution |
| Area Ratio LV/RV | 0,659 | Low resolution |
| Left Myocardium Area (Shape 2D) | 0,873 | High resolution |
| Left Myocardium Area (Shape 2D) | 0,859 | Low resolution |
| Left Myocardium Gray Level Non-Uniformity (GLRLM) | 0,980 | High resolution |
| Left Myocardium Gray Level Non-Uniformity (GLRLM) | 0,961 | Low resolution |
| Relative Septum Thickness | 0,898 | High resolution |
| Relative Septum Thickness | 0,800 | Low resolution |
| Left Myocardium Gray Level Non-Uniformity (GLSZM) | 0,960 | High resolution |
| Left Myocardium Gray Level Non-Uniformity (GLSZM) | 0,952 | Low resolution |
| Right Bloodpool Total Energy (First-order) | 1,000 | High resolution |
| Right Bloodpool Total Energy (First-order) | 0,997 | Low resolution |
| Radial Strain (min) | 0,843 | High resolution |
| Radial Strain (min) | 0,941 | Low resolution |
| Right Bloodpool Dependence Entropy (GLDM) | 0,980 | High resolution |
| Right Bloodpool Dependence Entropy (GLDM) | 0,932 | Low resolution |
| Left Bloodpool Gray Level Non-Uniformity (GLRLM) | 0,990 | High resolution |
| Left Bloodpool Gray Level Non-Uniformity (GLRLM) | 0,972 | Low resolution |
| Left Bloodpool Elongation (Shape 2D) | 0,825 | High resolution |
| Left Bloodpool Elongation (Shape 2D) | 0,795 | Low resolution |
| Right Bloodpool Zone Entropy (GLSZM) | 0,984 | High resolution |
| Right Bloodpool Zone Entropy (GLSZM) | 0,934 | Low resolution |
| Right Bloodpool Joint Entropy (GLCM) | 0,988 | High resolution |
| Right Bloodpool Joint Entropy (GLCM) | 0,878 | Low resolution |
| Right Bloodpool Elongation (Shape 2D) | 0,990 | High resolution |
| Right Bloodpool Elongation (Shape 2D) | 0,808 | Low resolution |
| Right Bloodpool Dependence Non-Uniformity (GLDM) | 0,991 | High resolution |
| Right Bloodpool Dependence Non-Uniformity (GLDM) | 0,944 | Low resolution |
| Right Bloodpool Mean (First-order) | 0,998 | High resolution |
| Right Bloodpool Mean (First-order) | 0,979 | Low resolution |
| Left Myocardium Run Length Non-Uniformity (GLRLM) | 0,860 | High resolution |
| Left Myocardium Run Length Non-Uniformity (GLRLM) | 0,794 | Low resolution |
| Left Bloodpool Area (Shape 2D) | 0,971 | High resolution |
| Left Bloodpool Area (Shape 2D) | 0,974 | Low resolution |
| Left Myocardium Sphericity (Shape 2D) | 0,902 | High resolution |
| Left Myocardium Sphericity (Shape 2D) | 0,824 | Low resolution |
| Circumferential Strain (mean) | 0,980 | High resolution |
| Circumferential Strain (mean) | 0,991 | Low resolution |
| Left Myocardium Elongation (Shape 2D) | 0,774 | High resolution |
| Left Myocardium Elongation (Shape 2D) | 0,704 | Low resolution |
| Left Bloodpool Fractal Dimensions | 0,989 | High resolution |
| Left Bloodpool Fractal Dimensions | 0,991 | Low resolution |
| Left Bloodpool Total Energy (First-order) | 1,000 | High resolution |
| Left Bloodpool Total Energy (First-order) | 1,000 | Low resolution |
| Left Bloodpool Joint Energy (GLCM) | 0,940 | High resolution |
| Left Bloodpool Joint Energy (GLCM) | 0,831 | Low resolution |
| Left Bloodpool Run Length Non-Uniformity (GLRLM) | 0,970 | High resolution |
| Left Bloodpool Run Length Non-Uniformity (GLRLM) | 0,968 | Low resolution |
| Left Myocardium Total Energy (First-order) | 0,985 | High resolution |
| Left Myocardium Total Energy (First-order) | 0,775 | Low resolution |
| Right Bloodpool Energy (First-order) | 1,000 | High resolution |
| Right Bloodpool Energy (First-order) | 0,997 | Low resolution |
| Right Bloodpool Short Run Emphasis (GLRLM) | 0,997 | High resolution |
| Right Bloodpool Short Run Emphasis (GLRLM) | 0,984 | Low resolution |
| Right Bloodpool 90th Percentile (First-order) | 1,000 | High resolution |
| Right Bloodpool 90th Percentile (First-order) | 0,994 | Low resolution |
| Left Bloodpool 90th Percentile (First-order) | 1,000 | High resolution |
| Left Bloodpool 90th Percentile (First-order) | 0,997 | Low resolution |
| Circumferential Strain (max) | 0,911 | High resolution |
| Circumferential Strain (max) | 0,974 | Low resolution |
| Left Bloodpool Energy (First-order) | 1,000 | High resolution |
| Left Bloodpool Energy (First-order) | 1,000 | Low resolution |
| Left Myocardium Zone Entropy (GLSZM) | 0,858 | High resolution |
| Left Myocardium Zone Entropy (GLSZM) | 0,578 | Low resolution |
| Left Myocardium Mean (First-order) | 0,997 | High resolution |
| Left Myocardium Mean (First-order) | 0,902 | Low resolution |
| Right Bloodpool Sum Entropy (GLCM) | 0,987 | High resolution |
| Right Bloodpool Sum Entropy (GLCM) | 0,844 | Low resolution |
| Left Myocardium Gray Level Non-Uniformity (GLDM) | 0,979 | High resolution |
| Left Myocardium Gray Level Non-Uniformity (GLDM) | 0,963 | Low resolution |
| Right Bloodpool Area (Shape 2D) | 0,992 | High resolution |
| Right Bloodpool Area (Shape 2D) | 0,975 | Low resolution |
| Left Myocardium 90th Percentile (First-order) | 0,991 | High resolution |
| Left Myocardium 90th Percentile (First-order) | 0,769 | Low resolution |
| Left Bloodpool Distance (OTSU) | 0,982 | High resolution |
| Left Bloodpool Distance (OTSU) | 0,889 | Low resolution |
| Left Bloodpool Joint Entropy (GLCM) | 0,977 | High resolution |
| Left Bloodpool Joint Entropy (GLCM) | 0,942 | Low resolution |
| Right Bloodpool Run Length Non-Uniformity (GLRLM) | 0,990 | High resolution |
| Right Bloodpool Run Length Non-Uniformity (GLRLM) | 0,965 | Low resolution |
| Right Bloodpool Joint Energy (GLCM) | 0,981 | High resolution |
| Right Bloodpool Joint Energy (GLCM) | 0,849 | Low resolution |

## Table S2. Intra-observer ICC Scores of Radiomic features

ICC values for intraobserver reproducibility of listed radiomic features on high and low-resolution images for observer 1 and 2.

| Feature | ICC | Acquisition | Observer |
| --- | --- | --- | --- |
| Radial Strain (min) | 0,871 | High resolution | Observer 1 |
| Radial Strain (min) | 0,944 | Low resolution | Observer 1 |
| Right Bloodpool Short Run Emphasis (GLRLM) | 0,999 | High resolution | Observer 1 |
| Right Bloodpool Short Run Emphasis (GLRLM) | 0,976 | Low resolution | Observer 1 |
| Left Bloodpool Short Run Emphasis (GLRLM) | 0,994 | High resolution | Observer 1 |
| Left Bloodpool Short Run Emphasis (GLRLM) | 0,982 | Low resolution | Observer 1 |
| Circumferential Strain (min) | 0,947 | High resolution | Observer 1 |
| Circumferential Strain (min) | 0,975 | Low resolution | Observer 1 |
| Right Bloodpool Zone Entropy (GLSZM) | 0,995 | High resolution | Observer 1 |
| Right Bloodpool Zone Entropy (GLSZM) | 0,977 | Low resolution | Observer 1 |
| Right Bloodpool Joint Entropy (GLCM) | 0,997 | High resolution | Observer 1 |
| Right Bloodpool Joint Entropy (GLCM) | 0,981 | Low resolution | Observer 1 |
| Left Myocardium Joint Entropy (GLCM) | 0,965 | High resolution | Observer 1 |
| Left Myocardium Joint Entropy (GLCM) | 0,734 | Low resolution | Observer 1 |
| Right Bloodpool Area (Shape 2D) | 0,999 | High resolution | Observer 1 |
| Right Bloodpool Area (Shape 2D) | 0,994 | Low resolution | Observer 1 |
| Left Myocardium Area (Shape 2D) | 0,938 | High resolution | Observer 1 |
| Left Myocardium Area (Shape 2D) | 0,912 | Low resolution | Observer 1 |
| Left Myocardium Short Run Emphasis (GLRLM) | 0,987 | High resolution | Observer 1 |
| Left Myocardium Short Run Emphasis (GLRLM) | 0,983 | Low resolution | Observer 1 |
| Radial Strain (mean) | 0,956 | High resolution | Observer 1 |
| Radial Strain (mean) | 0,978 | Low resolution | Observer 1 |
| Left Bloodpool Gray Level Non-Uniformity (GLDM) | 0,997 | High resolution | Observer 1 |
| Left Bloodpool Gray Level Non-Uniformity (GLDM) | 0,998 | Low resolution | Observer 1 |
| Left Bloodpool Energy (First-order) | 1,000 | High resolution | Observer 1 |
| Left Bloodpool Energy (First-order) | 1,000 | Low resolution | Observer 1 |
| Right Bloodpool Dependence Non-Uniformity (GLDM) | 0,998 | High resolution | Observer 1 |
| Right Bloodpool Dependence Non-Uniformity (GLDM) | 0,991 | Low resolution | Observer 1 |
| Right Bloodpool Mean (First-order) | 0,999 | High resolution | Observer 1 |
| Right Bloodpool Mean (First-order) | 0,985 | Low resolution | Observer 1 |
| Right Bloodpool Sum Entropy (GLCM) | 0,994 | High resolution | Observer 1 |
| Right Bloodpool Sum Entropy (GLCM) | 0,972 | Low resolution | Observer 1 |
| Left Myocardium Gray Level Non-Uniformity (GLRLM) | 0,974 | High resolution | Observer 1 |
| Left Myocardium Gray Level Non-Uniformity (GLRLM) | 0,992 | Low resolution | Observer 1 |
| Left Bloodpool Total Energy (First-order) | 1,000 | High resolution | Observer 1 |
| Left Bloodpool Total Energy (First-order) | 1,000 | Low resolution | Observer 1 |
| Relative Septum Thickness | 0,875 | High resolution | Observer 1 |
| Relative Septum Thickness | 0,910 | Low resolution | Observer 1 |
| Left Myocardium Gray Level Non-Uniformity (GLDM) | 0,978 | High resolution | Observer 1 |
| Left Myocardium Gray Level Non-Uniformity (GLDM) | 0,994 | Low resolution | Observer 1 |
| Left Myocardium Mean (First-order) | 0,996 | High resolution | Observer 1 |
| Left Myocardium Mean (First-order) | 0,923 | Low resolution | Observer 1 |
| Right Bloodpool Joint Energy (GLCM) | 0,997 | High resolution | Observer 1 |
| Right Bloodpool Joint Energy (GLCM) | 0,937 | Low resolution | Observer 1 |
| Left Bloodpool Sum Entropy (GLCM) | 0,973 | High resolution | Observer 1 |
| Left Bloodpool Sum Entropy (GLCM) | 0,964 | Low resolution | Observer 1 |
| Left Myocardium Run Length Non-Uniformity (GLRLM) | 0,924 | High resolution | Observer 1 |
| Left Myocardium Run Length Non-Uniformity (GLRLM) | 0,858 | Low resolution | Observer 1 |
| Right Bloodpool Gray Level Non-Uniformity (GLSZM) | 1,000 | High resolution | Observer 1 |
| Right Bloodpool Gray Level Non-Uniformity (GLSZM) | 0,996 | Low resolution | Observer 1 |
| Left Bloodpool Zone Entropy (GLSZM) | 0,983 | High resolution | Observer 1 |
| Left Bloodpool Zone Entropy (GLSZM) | 0,978 | Low resolution | Observer 1 |
| Left Bloodpool Dependence Non-Uniformity (GLDM) | 0,988 | High resolution | Observer 1 |
| Left Bloodpool Dependence Non-Uniformity (GLDM) | 0,978 | Low resolution | Observer 1 |
| Left Bloodpool Area (Shape 2D) | 0,988 | High resolution | Observer 1 |
| Left Bloodpool Area (Shape 2D) | 0,989 | Low resolution | Observer 1 |
| Right Bloodpool Gray Level Non-Uniformity (GLDM) | 1,000 | High resolution | Observer 1 |
| Right Bloodpool Gray Level Non-Uniformity (GLDM) | 0,998 | Low resolution | Observer 1 |
| Left Bloodpool Gray Level Non-Uniformity (GLSZM) | 0,994 | High resolution | Observer 1 |
| Left Bloodpool Gray Level Non-Uniformity (GLSZM) | 0,996 | Low resolution | Observer 1 |
| Left Myocardium Gray Level Non-Uniformity (GLSZM) | 0,962 | High resolution | Observer 1 |
| Left Myocardium Gray Level Non-Uniformity (GLSZM) | 0,984 | Low resolution | Observer 1 |
| Left Bloodpool Elongation (Shape 2D) | 0,887 | High resolution | Observer 1 |
| Left Bloodpool Elongation (Shape 2D) | 0,796 | Low resolution | Observer 1 |
| Left Myocardium 90th Percentile (First-order) | 0,992 | High resolution | Observer 1 |
| Left Myocardium 90th Percentile (First-order) | 0,844 | Low resolution | Observer 1 |
| Left Bloodpool Joint Entropy (GLCM) | 0,982 | High resolution | Observer 1 |
| Left Bloodpool Joint Entropy (GLCM) | 0,982 | Low resolution | Observer 1 |
| Left Myocardium Energy (First-order) | 0,979 | High resolution | Observer 1 |
| Left Myocardium Energy (First-order) | 0,846 | Low resolution | Observer 1 |
| Right Bloodpool Total Energy (First-order) | 1,000 | High resolution | Observer 1 |
| Right Bloodpool Total Energy (First-order) | 0,999 | Low resolution | Observer 1 |
| Right Bloodpool Sphericity (Shape 2D) | 0,942 | High resolution | Observer 1 |
| Right Bloodpool Sphericity (Shape 2D) | 0,905 | Low resolution | Observer 1 |
| Left Myocardium Dependence Non-Uniformity (GLDM) | 0,928 | High resolution | Observer 1 |
| Left Myocardium Dependence Non-Uniformity (GLDM) | 0,763 | Low resolution | Observer 1 |
| Area Ratio LV/RV | 0,978 | High resolution | Observer 1 |
| Area Ratio LV/RV | 0,902 | Low resolution | Observer 1 |
| Left Bloodpool Gray Level Non-Uniformity (GLRLM) | 0,996 | High resolution | Observer 1 |
| Left Bloodpool Gray Level Non-Uniformity (GLRLM) | 0,998 | Low resolution | Observer 1 |
| Right Bloodpool Run Length Non-Uniformity (GLRLM) | 0,999 | High resolution | Observer 1 |
| Right Bloodpool Run Length Non-Uniformity (GLRLM) | 0,993 | Low resolution | Observer 1 |
| Right Bloodpool Gray Level Non-Uniformity (GLRLM) | 1,000 | High resolution | Observer 1 |
| Right Bloodpool Gray Level Non-Uniformity (GLRLM) | 0,998 | Low resolution | Observer 1 |
| Radial Strain (max) | 0,966 | High resolution | Observer 1 |
| Radial Strain (max) | 0,997 | Low resolution | Observer 1 |
| Right Bloodpool Dependence Entropy (GLDM) | 0,995 | High resolution | Observer 1 |
| Right Bloodpool Dependence Entropy (GLDM) | 0,978 | Low resolution | Observer 1 |
| Right Bloodpool Elongation (Shape 2D) | 0,993 | High resolution | Observer 1 |
| Right Bloodpool Elongation (Shape 2D) | 0,899 | Low resolution | Observer 1 |
| Left Myocardium Dependence Entropy (GLDM) | 0,956 | High resolution | Observer 1 |
| Left Myocardium Dependence Entropy (GLDM) | 0,777 | Low resolution | Observer 1 |
| Left Bloodpool Fractal Dimensions | 0,995 | High resolution | Observer 1 |
| Left Bloodpool Fractal Dimensions | 0,987 | Low resolution | Observer 1 |
| Circumferential Strain (mean) | 0,968 | High resolution | Observer 1 |
| Circumferential Strain (mean) | 0,971 | Low resolution | Observer 1 |
| Left Myocardium Total Energy (First-order) | 0,984 | High resolution | Observer 1 |
| Left Myocardium Total Energy (First-order) | 0,837 | Low resolution | Observer 1 |
| Circumferential Strain (max) | 0,844 | High resolution | Observer 1 |
| Circumferential Strain (max) | 0,960 | Low resolution | Observer 1 |
| Left Bloodpool Joint Energy (GLCM) | 0,983 | High resolution | Observer 1 |
| Left Bloodpool Joint Energy (GLCM) | 0,980 | Low resolution | Observer 1 |
| Left Bloodpool Mean (First-order) | 0,985 | High resolution | Observer 1 |
| Left Bloodpool Mean (First-order) | 0,960 | Low resolution | Observer 1 |
| Left Bloodpool 90th Percentile (First-order) | 1,000 | High resolution | Observer 1 |
| Left Bloodpool 90th Percentile (First-order) | 0,999 | Low resolution | Observer 1 |
| Left Myocardium Sphericity (Shape 2D) | 0,943 | High resolution | Observer 1 |
| Left Myocardium Sphericity (Shape 2D) | 0,928 | Low resolution | Observer 1 |
| Right Bloodpool Energy (First-order) | 1,000 | High resolution | Observer 1 |
| Right Bloodpool Energy (First-order) | 0,999 | Low resolution | Observer 1 |
| Left Bloodpool Dependence Entropy (GLDM) | 0,978 | High resolution | Observer 1 |
| Left Bloodpool Dependence Entropy (GLDM) | 0,982 | Low resolution | Observer 1 |
| Left Myocardium Sum Entropy (GLCM) | 0,969 | High resolution | Observer 1 |
| Left Myocardium Sum Entropy (GLCM) | 0,871 | Low resolution | Observer 1 |
| Left Bloodpool Distance (OTSU) | 0,967 | High resolution | Observer 1 |
| Left Bloodpool Distance (OTSU) | 0,948 | Low resolution | Observer 1 |
| Left Bloodpool Sphericity (Shape 2D) | 0,439 | High resolution | Observer 1 |
| Left Bloodpool Sphericity (Shape 2D) | 0,571 | Low resolution | Observer 1 |
| Relative RV Diameter | 0,689 | High resolution | Observer 1 |
| Relative RV Diameter | 0,897 | Low resolution | Observer 1 |
| Left Bloodpool Run Length Non-Uniformity (GLRLM) | 0,988 | High resolution | Observer 1 |
| Left Bloodpool Run Length Non-Uniformity (GLRLM) | 0,986 | Low resolution | Observer 1 |
| Left Myocardium Joint Energy (GLCM) | 0,982 | High resolution | Observer 1 |
| Left Myocardium Joint Energy (GLCM) | 0,875 | Low resolution | Observer 1 |
| Left Myocardium Elongation (Shape 2D) | 0,703 | High resolution | Observer 1 |
| Left Myocardium Elongation (Shape 2D) | 0,857 | Low resolution | Observer 1 |
| Left Myocardium Zone Entropy (GLSZM) | 0,932 | High resolution | Observer 1 |
| Left Myocardium Zone Entropy (GLSZM) | 0,757 | Low resolution | Observer 1 |
| Right Bloodpool 90th Percentile (First-order) | 1,000 | High resolution | Observer 1 |
| Right Bloodpool 90th Percentile (First-order) | 0,997 | Low resolution | Observer 1 |
| Radial Strain (min) | 0,908 | High resolution | Observer 2 |
| Radial Strain (min) | 0,943 | Low resolution | Observer 2 |
| Right Bloodpool Short Run Emphasis (GLRLM) | 0,999 | High resolution | Observer 2 |
| Right Bloodpool Short Run Emphasis (GLRLM) | 0,987 | Low resolution | Observer 2 |
| Left Bloodpool Short Run Emphasis (GLRLM) | 0,982 | High resolution | Observer 2 |
| Left Bloodpool Short Run Emphasis (GLRLM) | 0,971 | Low resolution | Observer 2 |
| Circumferential Strain (min) | 0,964 | High resolution | Observer 2 |
| Circumferential Strain (min) | 0,988 | Low resolution | Observer 2 |
| Right Bloodpool Zone Entropy (GLSZM) | 0,994 | High resolution | Observer 2 |
| Right Bloodpool Zone Entropy (GLSZM) | 0,941 | Low resolution | Observer 2 |
| Right Bloodpool Joint Entropy (GLCM) | 0,998 | High resolution | Observer 2 |
| Right Bloodpool Joint Entropy (GLCM) | 0,934 | Low resolution | Observer 2 |
| Left Myocardium Joint Entropy (GLCM) | 0,914 | High resolution | Observer 2 |
| Left Myocardium Joint Entropy (GLCM) | 0,923 | Low resolution | Observer 2 |
| Right Bloodpool Area (Shape 2D) | 0,999 | High resolution | Observer 2 |
| Right Bloodpool Area (Shape 2D) | 0,976 | Low resolution | Observer 2 |
| Left Myocardium Area (Shape 2D) | 0,937 | High resolution | Observer 2 |
| Left Myocardium Area (Shape 2D) | 0,967 | Low resolution | Observer 2 |
| Left Myocardium Short Run Emphasis (GLRLM) | 0,984 | High resolution | Observer 2 |
| Left Myocardium Short Run Emphasis (GLRLM) | 0,985 | Low resolution | Observer 2 |
| Radial Strain (mean) | 0,943 | High resolution | Observer 2 |
| Radial Strain (mean) | 0,988 | Low resolution | Observer 2 |
| Left Bloodpool Gray Level Non-Uniformity (GLDM) | 0,993 | High resolution | Observer 2 |
| Left Bloodpool Gray Level Non-Uniformity (GLDM) | 0,993 | Low resolution | Observer 2 |
| Left Bloodpool Energy (First-order) | 0,999 | High resolution | Observer 2 |
| Left Bloodpool Energy (First-order) | 1,000 | Low resolution | Observer 2 |
| Right Bloodpool Dependence Non-Uniformity (GLDM) | 0,999 | High resolution | Observer 2 |
| Right Bloodpool Dependence Non-Uniformity (GLDM) | 0,948 | Low resolution | Observer 2 |
| Right Bloodpool Mean (First-order) | 0,999 | High resolution | Observer 2 |
| Right Bloodpool Mean (First-order) | 0,992 | Low resolution | Observer 2 |
| Right Bloodpool Sum Entropy (GLCM) | 0,995 | High resolution | Observer 2 |
| Right Bloodpool Sum Entropy (GLCM) | 0,893 | Low resolution | Observer 2 |
| Left Myocardium Gray Level Non-Uniformity (GLRLM) | 0,980 | High resolution | Observer 2 |
| Left Myocardium Gray Level Non-Uniformity (GLRLM) | 0,989 | Low resolution | Observer 2 |
| Left Bloodpool Total Energy (First-order) | 0,999 | High resolution | Observer 2 |
| Left Bloodpool Total Energy (First-order) | 1,000 | Low resolution | Observer 2 |
| Relative Septum Thickness | 0,931 | High resolution | Observer 2 |
| Relative Septum Thickness | 0,869 | Low resolution | Observer 2 |
| Left Myocardium Gray Level Non-Uniformity (GLDM) | 0,985 | High resolution | Observer 2 |
| Left Myocardium Gray Level Non-Uniformity (GLDM) | 0,990 | Low resolution | Observer 2 |
| Left Myocardium Mean (First-order) | 0,973 | High resolution | Observer 2 |
| Left Myocardium Mean (First-order) | 0,887 | Low resolution | Observer 2 |
| Right Bloodpool Joint Energy (GLCM) | 0,998 | High resolution | Observer 2 |
| Right Bloodpool Joint Energy (GLCM) | 0,946 | Low resolution | Observer 2 |
| Left Bloodpool Sum Entropy (GLCM) | 0,956 | High resolution | Observer 2 |
| Left Bloodpool Sum Entropy (GLCM) | 0,962 | Low resolution | Observer 2 |
| Left Myocardium Run Length Non-Uniformity (GLRLM) | 0,906 | High resolution | Observer 2 |
| Left Myocardium Run Length Non-Uniformity (GLRLM) | 0,957 | Low resolution | Observer 2 |
| Right Bloodpool Gray Level Non-Uniformity (GLSZM) | 1,000 | High resolution | Observer 2 |
| Right Bloodpool Gray Level Non-Uniformity (GLSZM) | 0,990 | Low resolution | Observer 2 |
| Left Bloodpool Zone Entropy (GLSZM) | 0,958 | High resolution | Observer 2 |
| Left Bloodpool Zone Entropy (GLSZM) | 0,973 | Low resolution | Observer 2 |
| Left Bloodpool Dependence Non-Uniformity (GLDM) | 0,977 | High resolution | Observer 2 |
| Left Bloodpool Dependence Non-Uniformity (GLDM) | 0,989 | Low resolution | Observer 2 |
| Left Bloodpool Area (Shape 2D) | 0,988 | High resolution | Observer 2 |
| Left Bloodpool Area (Shape 2D) | 0,994 | Low resolution | Observer 2 |
| Right Bloodpool Gray Level Non-Uniformity (GLDM) | 1,000 | High resolution | Observer 2 |
| Right Bloodpool Gray Level Non-Uniformity (GLDM) | 0,997 | Low resolution | Observer 2 |
| Left Bloodpool Gray Level Non-Uniformity (GLSZM) | 0,988 | High resolution | Observer 2 |
| Left Bloodpool Gray Level Non-Uniformity (GLSZM) | 0,989 | Low resolution | Observer 2 |
| Left Myocardium Gray Level Non-Uniformity (GLSZM) | 0,956 | High resolution | Observer 2 |
| Left Myocardium Gray Level Non-Uniformity (GLSZM) | 0,984 | Low resolution | Observer 2 |
| Left Bloodpool Elongation (Shape 2D) | 0,900 | High resolution | Observer 2 |
| Left Bloodpool Elongation (Shape 2D) | 0,838 | Low resolution | Observer 2 |
| Left Myocardium 90th Percentile (First-order) | 0,820 | High resolution | Observer 2 |
| Left Myocardium 90th Percentile (First-order) | 0,772 | Low resolution | Observer 2 |
| Left Bloodpool Joint Entropy (GLCM) | 0,977 | High resolution | Observer 2 |
| Left Bloodpool Joint Entropy (GLCM) | 0,980 | Low resolution | Observer 2 |
| Left Myocardium Energy (First-order) | 0,923 | High resolution | Observer 2 |
| Left Myocardium Energy (First-order) | 0,917 | Low resolution | Observer 2 |
| Right Bloodpool Total Energy (First-order) | 1,000 | High resolution | Observer 2 |
| Right Bloodpool Total Energy (First-order) | 0,993 | Low resolution | Observer 2 |
| Right Bloodpool Sphericity (Shape 2D) | 0,920 | High resolution | Observer 2 |
| Right Bloodpool Sphericity (Shape 2D) | 0,752 | Low resolution | Observer 2 |
| Left Myocardium Dependence Non-Uniformity (GLDM) | 0,881 | High resolution | Observer 2 |
| Left Myocardium Dependence Non-Uniformity (GLDM) | 0,939 | Low resolution | Observer 2 |
| Area Ratio LV/RV | 0,969 | High resolution | Observer 2 |
| Area Ratio LV/RV | 0,933 | Low resolution | Observer 2 |
| Left Bloodpool Gray Level Non-Uniformity (GLRLM) | 0,991 | High resolution | Observer 2 |
| Left Bloodpool Gray Level Non-Uniformity (GLRLM) | 0,992 | Low resolution | Observer 2 |
| Right Bloodpool Run Length Non-Uniformity (GLRLM) | 0,999 | High resolution | Observer 2 |
| Right Bloodpool Run Length Non-Uniformity (GLRLM) | 0,967 | Low resolution | Observer 2 |
| Right Bloodpool Gray Level Non-Uniformity (GLRLM) | 1,000 | High resolution | Observer 2 |
| Right Bloodpool Gray Level Non-Uniformity (GLRLM) | 0,995 | Low resolution | Observer 2 |
| Radial Strain (max) | 0,950 | High resolution | Observer 2 |
| Radial Strain (max) | 0,997 | Low resolution | Observer 2 |
| Right Bloodpool Dependence Entropy (GLDM) | 0,994 | High resolution | Observer 2 |
| Right Bloodpool Dependence Entropy (GLDM) | 0,949 | Low resolution | Observer 2 |
| Right Bloodpool Elongation (Shape 2D) | 0,987 | High resolution | Observer 2 |
| Right Bloodpool Elongation (Shape 2D) | 0,804 | Low resolution | Observer 2 |
| Left Myocardium Dependence Entropy (GLDM) | 0,858 | High resolution | Observer 2 |
| Left Myocardium Dependence Entropy (GLDM) | 0,837 | Low resolution | Observer 2 |
| Left Bloodpool Fractal Dimensions | 0,988 | High resolution | Observer 2 |
| Left Bloodpool Fractal Dimensions | 0,984 | Low resolution | Observer 2 |
| Circumferential Strain (mean) | 0,993 | High resolution | Observer 2 |
| Circumferential Strain (mean) | 0,997 | Low resolution | Observer 2 |
| Left Myocardium Total Energy (First-order) | 0,927 | High resolution | Observer 2 |
| Left Myocardium Total Energy (First-order) | 0,904 | Low resolution | Observer 2 |
| Circumferential Strain (max) | 0,893 | High resolution | Observer 2 |
| Circumferential Strain (max) | 0,989 | Low resolution | Observer 2 |
| Left Bloodpool Joint Energy (GLCM) | 0,952 | High resolution | Observer 2 |
| Left Bloodpool Joint Energy (GLCM) | 0,901 | Low resolution | Observer 2 |
| Left Bloodpool Mean (First-order) | 0,987 | High resolution | Observer 2 |
| Left Bloodpool Mean (First-order) | 0,981 | Low resolution | Observer 2 |
| Left Bloodpool 90th Percentile (First-order) | 1,000 | High resolution | Observer 2 |
| Left Bloodpool 90th Percentile (First-order) | 0,998 | Low resolution | Observer 2 |
| Left Myocardium Sphericity (Shape 2D) | 0,942 | High resolution | Observer 2 |
| Left Myocardium Sphericity (Shape 2D) | 0,925 | Low resolution | Observer 2 |
| Right Bloodpool Energy (First-order) | 1,000 | High resolution | Observer 2 |
| Right Bloodpool Energy (First-order) | 0,994 | Low resolution | Observer 2 |
| Left Bloodpool Dependence Entropy (GLDM) | 0,963 | High resolution | Observer 2 |
| Left Bloodpool Dependence Entropy (GLDM) | 0,977 | Low resolution | Observer 2 |
| Left Myocardium Sum Entropy (GLCM) | 0,858 | High resolution | Observer 2 |
| Left Myocardium Sum Entropy (GLCM) | 0,909 | Low resolution | Observer 2 |
| Left Bloodpool Distance (OTSU) | 0,935 | High resolution | Observer 2 |
| Left Bloodpool Distance (OTSU) | 0,972 | Low resolution | Observer 2 |
| Left Bloodpool Sphericity (Shape 2D) | 0,268 | High resolution | Observer 2 |
| Left Bloodpool Sphericity (Shape 2D) | 0,663 | Low resolution | Observer 2 |
| Relative RV Diameter | 0,985 | High resolution | Observer 2 |
| Relative RV Diameter | 0,819 | Low resolution | Observer 2 |
| Left Bloodpool Run Length Non-Uniformity (GLRLM) | 0,985 | High resolution | Observer 2 |
| Left Bloodpool Run Length Non-Uniformity (GLRLM) | 0,993 | Low resolution | Observer 2 |
| Left Myocardium Joint Energy (GLCM) | 0,943 | High resolution | Observer 2 |
| Left Myocardium Joint Energy (GLCM) | 0,927 | Low resolution | Observer 2 |
| Left Myocardium Elongation (Shape 2D) | 0,763 | High resolution | Observer 2 |
| Left Myocardium Elongation (Shape 2D) | 0,733 | Low resolution | Observer 2 |
| Left Myocardium Zone Entropy (GLSZM) | 0,762 | High resolution | Observer 2 |
| Left Myocardium Zone Entropy (GLSZM) | 0,794 | Low resolution | Observer 2 |
| Right Bloodpool 90th Percentile (First-order) | 1,000 | High resolution | Observer 2 |
| Right Bloodpool 90th Percentile (First-order) | 0,990 | Low resolution | Observer 2 |

Tab. S3 Average values with standard deviation as well as p. values of robust features between healthy volonteers HFrEF and HFpEF patients

| **Feature** | **Phase** | **HFpEF (avg.+-stddev)** | **HFrEF (avg.+-stddev)** | **Healthy volonteers (avg.+-stddev)** | **p-value (Healthy vs. HFpEF)** | **p-value (Healthy vs. HFrEF)** | **p-value (HFpEF vs. HFrEF)** |
| --- | --- | --- | --- | --- | --- | --- | --- |
| Left Myocardium Area Ratio (Shape 2D) | End-Diastole | 0.42±0.04 | 0.36±0.04 | 0.38±0.04 | **0.0107** | 0.2235 | 0.0003 |
| Left Myocardium Area Ratio (Shape 2D) | End-Systole | 0.63±0.06 | 0.47±0.05 | 0.60±0.06 | 0.0577 | 0 | 0 |
| Left Myocardium Sphericity (Shape 2D) | End-Diastole | 0.43±0.02 | 0.40±0.02 | 0.40±0.02 | **0.0079** | 0.2936 | 0.0004 |
| Left Myocardium Sphericity (Shape 2D) | End-Systole | 0.52±0.02 | 0.45±0.03 | 0.51±0.02 | 0.0674 | 0 | 0 |
| Left Myocardium Run Length Non-Uniformity (GLRLM) | End-Diastole | 447.16±62.77 | 520.71±81.82 | 400.06±68.64 | 0.0909 | 0 | 0.0037 |
| Left Myocardium Run Length Non-Uniformity (GLRLM) | End-Systole | 437.23±77.09 | 520.75±100.47 | 400.75±62.51 | 0.2695 | 0.0001 | 0.0056 |
| Left Myocardium Joint Energy (GLCM) | End-Diastole | 0.01±0.00 | 0.01±0.00 | 0.01±0.00 | 0.5809 | 0.7382 | 0.6976 |
| Left Myocardium Joint Energy (GLCM) | End-Systole | 0.01±0.01 | 0.01±0.00 | 0.01±0.01 | 0.2549 | 0.0018 | 0.0521 |
| Left Bloodpool Area (Shape 2D) | End-Diastole | 1844.86±371.90 | 2820.98±586.84 | 1928.50±244.02 | 0.317 | 0 | 0 |
| Left Bloodpool Area (Shape 2D) | End-Systole | 983.53±357.89 | 2100.72±556.25 | 1031.75±233.31 | 0.2017 | 0 | 0 |
| Left Bloodpool Elongation (Shape 2D) | End-Diastole | 0.93±0.05 | 0.91±0.04 | 0.92±0.04 | 0.4902 | 0.445 | 0.1265 |
| Left Bloodpool Elongation (Shape 2D) | End-Systole | 0.91±0.03 | 0.88±0.05 | 0.91±0.02 | 0.5346 | 0.0317 | 0.1265 |
| Left Bloodpool Dependence Non-Uniformity (GLDM) | End-Diastole | 381.98±58.92 | 527.96±106.30 | 387.83±49.26 | 0.3697 | 0 | 0 |
| Left Bloodpool Dependence Non-Uniformity (GLDM) | End-Systole | 205.52±57.21 | 389.20±100.91 | 206.71±42.55 | 0.7301 | 0 | 0 |
| Left Bloodpool Run Length Non-Uniformity (GLRLM) | End-Diastole | 673.36±123.08 | 993.01±199.08 | 693.59±80.16 | 0.2408 | 0 | 0 |
| Left Bloodpool Run Length Non-Uniformity (GLRLM) | End-Systole | 356.67±117.43 | 734.89±191.24 | 370.25±78.46 | 0.2272 | 0 | 0 |
| Left Bloodpool Joint Energy (GLCM) | End-Diastole | 0.00±0.00 | 0.00±0.00 | 0.00±0.00 | 0.3884 | 0.3277 | 0.9381 |
| Left Bloodpool Joint Energy (GLCM) | End-Systole | 0.00±0.00 | 0.00±0.00 | 0.00±0.00 | 0.3006 | 0.0003 | 0 |
| Right Bloodpool Elongation (Shape 2D) | End-Diastole | 0.72±0.12 | 0.59±0.10 | 0.69±0.08 | 0.4902 | 0.0007 | 0.001 |
| Right Bloodpool Elongation (Shape 2D) | End-Systole | 0.65±0.14 | 0.58±0.12 | 0.66±0.07 | 0.7562 | 0.0028 | 0.0659 |
| Right Bloodpool Joint Energy (GLCM) | End-Diastole | 0.00±0.00 | 0.00±0.00 | 0.00±0.00 | 0.7562 | 0.7025 | 0.8765 |
| Right Bloodpool Joint Energy (GLCM) | End-Systole | 0.00±0.00 | 0.00±0.00 | 0.00±0.00 | 0.0845 | 0.1045 | 0.9175 |
| Relative RV Diameter | End-Diastole | 0.38±0.06 | 0.29±0.06 | 0.38±0.03 | 0.8902 | 0 | 0.0001 |
| Relative RV Diameter | End-Systole | 0.35±0.07 | 0.28±0.06 | 0.37±0.04 | 0.6291 | 0 | 0.0032 |
| Relative Septum Thickness | End-Diastole | 0.09±0.02 | 0.09±0.02 | 0.08±0.01 | 0.0297 | 0.1208 | 0.422 |
| Relative Septum Thickness | End-Systole | 0.14±0.02 | 0.12±0.02 | 0.14±0.02 | 0.2695 | 0.0181 | 0.0022 |
| Circumferential Strain (mean) | End-Diastole | 0.00±0.01 | 0.01±0.01 | 0.01±0.01 | 0.1879 | 0.6415 | 0.0358 |
| Circumferential Strain (mean) | End-Systole | -0.13±0.03 | -0.07±0.03 | -0.15±0.03 | 0.2408 | 0 | 0 |
